# Supplementary material for: A literature review on operational decisions applied to collaborative supply chains
Source: PubMed Central journal article supplement (PMC7069626; doi:10.1371/journal.pone.0230152), 2020-03-13
Supplement: pone.0230152.s001.pdf [file pone.0230152.s001.pdf]

**S1 Table. List of the 92 articles included in the analysis.** This list is organised by importance according to the number of citations. This organization of articles is utilized for the following tables.

| No Reference | No Reference | No Reference |
|--------------|--------------|--------------|
| 1 [16]       | 32 [68]      | 63 [112]     |
| 2 [34]       | 33 [56]      | 64 [72]      |
| 3 [51]       | 34 [22]      | 65 [73]      |
| 4 [124]      | 35 [125]     | 66 [113]     |
| 5 [126]      | 36 [57]      | 67 [127]     |
| 6 [78]       | 37 [88]      | 68 [90]      |
| 7 [69]       | 38 [25]      | 69 [61]      |
| 8 [63]       | 39 [59]      | 70 [23]      |
| 9 [11]       | 40 [115]     | 71 [84]      |
| 10 [104]     | 41 [121]     | 72 [98]      |
| 11 [52]      | 42 [119]     | 73 [44]      |
| 12 [83]      | 43 [103]     | 74 [117]     |
| 13 [107]     | 44 [128]     | 75 [129]     |
| 14 [106]     | 45 [109]     | 76 [130]     |
| 15 [91]      | 46 [131]     | 77 [132]     |
| 16 [70]      | 47 [133]     | 78 [76]      |
| 17 [100]     | 48 [99]      | 79 [134]     |
| 18 [86]      | 49 [108]     | 80 [135]     |
| 19 [105]     | 50 [94]      | 81 [136]     |
| 20 [137]     | 51 [81]      | 82 [80]      |
| 21 [138]     | 52 [116]     | 83 [139]     |
| 22 [140]     | 53 [82]      | 84 [87]      |
| 23 [77]      | 54 [118]     | 85 [141]     |
| 24 [142]     | 55 [110]     | 86 [143]     |
| 25 [71]      | 56 [144]     | 87 [32]      |
| 26 [94]      | 57 [43]      | 88 [145]     |
| 27 [146]     | 58 [74]      | 89 [147]     |
| 28 [60]      | 59 [148]     | 90 [89]      |
| 29 [75]      | 60 [149]     | 91 [96]      |
| 30 [85]      | 61 [150]     | 92 [42]      |
| 31 [95]      | 62 [111]     |              |
