# Supplementary material for: A literature review on operational decisions applied to collaborative supply chains
Source: PubMed Central journal article supplement (PMC7069626; doi:10.1371/journal.pone.0230152), 2020-03-13
Supplement: pone.0230152.s002.pdf [file pone.0230152.s002.pdf]

S2 Table. IE summary.

|    | Articles            | Dimension                |
|----|---------------------|--------------------------|
|    | IE                  | Intercompany integration |
|    | VMR                 |                          |
|    | SSC                 |                          |
|    | Empirical           | Type of research         |
|    | Theoretical         |                          |
|    | Behavioural         |                          |
|    | Descriptive         |                          |
|    | 2                   | Number of echelons       |
|    | 3                   |                          |
|    | 4+                  |                          |
|    | N/A                 |                          |
|    | Serial              | Supply chain structure   |
|    | Network             |                          |
|    | Convergent          |                          |
|    | Divergent           |                          |
|    | N/A                 | Type of demand           |
|    | Simulated           |                          |
|    | Real                |                          |
|    | N/A                 |                          |
|    | ARIMA               | Forecasting technique    |
|    | Moving Average      |                          |
|    | Exp. Smoothing      |                          |
|    | Linear Regression   |                          |
|    | Machine learning    |                          |
|    | Other               |                          |
|    | N/A                 |                          |
|    | Classical OUT       |                          |
|    | Control Engineering |                          |
|    | Beer game           |                          |
|    | EOQ                 | Replenishment policy     |
|    | JIT                 |                          |
|    | Other               |                          |
|    | N/A                 |                          |
|    | Backordering        | Inventory assumptions    |
|    | Lost-sales          |                          |
|    | N/A                 |                          |
|    | BWE                 | Collaboration objective  |
|    | Uncertainty         |                          |
|    | Customer service    |                          |
|    | Inventory level     |                          |
|    | Reduce costs        |                          |
|    | N/A                 |                          |
|    | Reduced             | Bullwhip effect          |
|    | Non reduced         |                          |
|    | Statements of facts |                          |
|    | N/A                 |                          |
| 1  | x                   |                          |
| 2  | x                   | x                        |
| 4  | x                   |                          |
| 5  | x                   |                          |
| 6  | x                   |                          |
| 7  | x                   |                          |
| 8  | x                   |                          |
| 12 | x                   |                          |
| 14 | x                   | x                        |
| 15 | x                   |                          |
| 16 | x                   |                          |
| 17 | x                   |                          |
| 18 | x                   |                          |
