# Supplementary material for: A literature review on operational decisions applied to collaborative supply chains
Source: PubMed Central journal article supplement (PMC7069626; doi:10.1371/journal.pone.0230152), 2020-03-13
Supplement: pone.0230152.s005.pdf [file pone.0230152.s005.pdf]

**S1 Appendix. Search commands employed.** The filter applied to select the articles has two differentiated parts. The first one focused on the collaboration models:

((TITLE-ABS-KEY ( supply AND chain AND collaboration ) OR  
TITLE-ABS-KEY ( collaborative AND model ) OR TITLE-ABS-KEY ( collaborative AND supply AND chain ) OR TITLE-ABS-KEY ( supply AND chain AND coordination ) OR TITLE-ABS-KEY ( information AND sharing ) OR TITLE-ABS-KEY ( supply AND chain AND integration ) OR TITLE-ABS-KEY ( vmi ) OR TITLE-ABS-KEY ( vmr ) OR TITLE-ABS-KEY ( vmi ) OR TITLE-ABS-KEY ( cpfr ) OR TITLE-ABS-KEY ( ecr ) OR TITLE-ABS-KEY ( information AND exchange )))

and the second one referring to BWE:

AND ( ( TITLE-ABS-KEY ( bullwhip AND effect ) OR TITLE-ABS-KEY ( forrester AND effect ) OR TITLE-ABS-KEY ( bullwhip ) OR TITLE-ABS-KEY ( bullwhip-effect ) ) )
