# Supplementary material for: A literature review on operational decisions applied to collaborative supply chains
Source: PLoS One. 2020 Mar 13;15(3):e0230152. doi: 10.1371/journal.pone.0230152 (PMC7069626; doi:10.1371/journal.pone.0230152)
Supplement: S3 Table — (PDF) [file pone.0230152.s003.pdf]

|    | Articles |                     |
|----|----------|---------------------|
| 62 |          | IE                  |
| 63 | x        | x                   |
| 66 | x        | x                   |
| 87 | x        | x                   |
|    |          | SSC                 |
|    |          | Empirical           |
|    |          | Theoretical         |
|    |          | Behavioural         |
|    | x        | Descriptive         |
|    |          | 2                   |
|    |          | 3                   |
|    |          | 4+                  |
|    |          | N/A                 |
|    |          | Serial              |
|    |          | Network             |
|    |          | Convergent          |
|    |          | Divergent           |
|    | x        | N/A                 |
|    |          | Simulated           |
|    |          | Real                |
|    | x        | N/A                 |
|    |          | ARIMA               |
|    |          | Moving Average      |
|    |          | Exp. Smoothing      |
|    |          | Linear Regression   |
|    |          | Machine learning    |
|    |          | Other               |
|    | x        | N/A                 |
|    |          | Classical OUT       |
|    |          | Control Engin.      |
|    |          | Beer game           |
|    |          | EOQ                 |
|    |          | JIT                 |
|    |          | Other               |
|    | x        | N/A                 |
|    |          | Backordering        |
|    | x        | Lost-sales          |
|    | x        | N/A                 |
|    |          | BWE                 |
|    |          | Uncertainty         |
|    |          | Customer service    |
|    |          | Inventory level     |
|    | s        | Reduce costs        |
|    | x        | N/A                 |
|    |          | Reduced             |
|    |          | Non reduced         |
|    | x        | Statements of facts |
|    |          | N/A                 |
