# Supplementary material for: A literature review on operational decisions applied to collaborative supply chains
Source: PLoS One. 2020 Mar 13;15(3):e0230152. doi: 10.1371/journal.pone.0230152 (PMC7069626; doi:10.1371/journal.pone.0230152)
Supplement: S4 Table — (PDF) [file pone.0230152.s004.pdf]

S4 Table. SSC summary.

| Articles | Dimension                |                     |
|----------|--------------------------|---------------------|
| 2        | Intercompany integration | IE                  |
| 28       |                          | VMR                 |
| 37       |                          | SSC                 |
| 38       | Type of research         | Empirical           |
| 40       |                          | Theoretical         |
| 42       |                          | Behavioural         |
| 52       |                          | Descriptive         |
| 54       | Number of echelons       | 2                   |
| 57       |                          | 3                   |
| 74       |                          | 4+                  |
| 87       |                          | N/A                 |
| 2        | Supply chain structure   | Serial              |
| 28       |                          | Network             |
| 37       |                          | Convergent          |
| 38       |                          | Divergent           |
| 40       |                          | N/A                 |
| 42       | Type of demand           | Simulated           |
| 52       |                          | Real                |
| 54       |                          | N/A                 |
| 57       | Forecasting technique    | ARIMA               |
| 74       |                          | Moving Average      |
| 87       |                          | Exp. Smoothing      |
|          |                          | Linear Regression   |
|          |                          | Machine learning    |
|          |                          | Other               |
|          |                          | N/A                 |
|          | Replenishment policy     | Classical OUT       |
|          |                          | Control Engin.      |
|          |                          | Beer game           |
|          |                          | EOQ                 |
|          |                          | JIT                 |
|          |                          | Other               |
|          |                          | N/A                 |
|          | Inventory assumptions    | Backordering        |
|          |                          | Lost-sales          |
|          |                          | N/A                 |
|          | Collaboration objective  | BWE                 |
|          |                          | Uncertainty         |
|          |                          | Customer service    |
|          |                          | Inventory level     |
|          |                          | Reduce costs        |
|          |                          | N/A                 |
|          |                          | Reduced             |
|          | Bullwhip effect          | Non reduced         |
|          |                          | Statements of facts |
|          |                          | N/A                 |
